# Supplementary material
Source: PubMed Central journal article supplement (PMC8628372)
Supplement: NIHMS1732477-supplement-Supplemental_Material.pdf [file NIHMS1732477-supplement-Supplemental_Material.pdf]

**SUPPLEMENTAL MATERIAL**

**Supplemental Figure I.** Consort diagram accounting for KCCQ-12 score missingness.

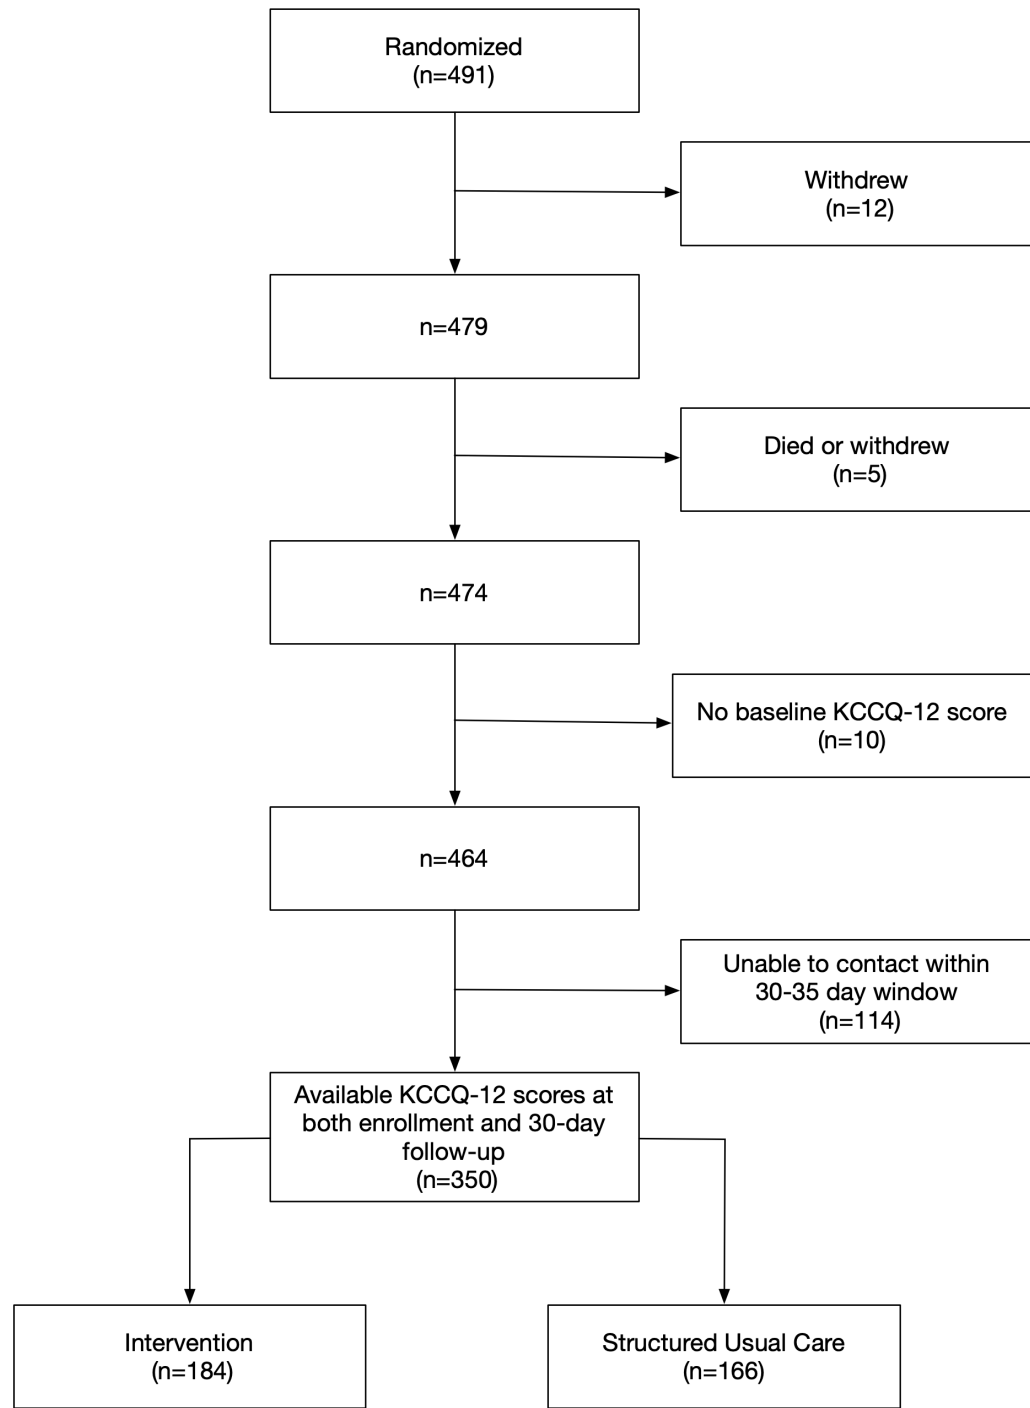

**Supplemental Table I.** Baseline characteristics of patients with available KCCQ-12 scores at both enrollment and 30 day follow-up (included) versus patients who had withdrawn, died, or had missing scores at either enrollment and/or follow-up (excluded).

|                                               | <b>N</b> | <b>Included</b>      | <b>Excluded</b>      | <b>Combined</b>       | <b>P-value</b> |
|-----------------------------------------------|----------|----------------------|----------------------|-----------------------|----------------|
|                                               |          | N=350                | N=129                | N=479                 |                |
| <b>Gender</b>                                 | 479      |                      |                      |                       | 0.408          |
| Male                                          | 479      | 63% (219)            | 67% (86)             | 64% (305)             |                |
| Female                                        | 479      | 37% (131)            | 33% (43)             | 36% (174)             |                |
| <b>Race</b>                                   | 479      |                      |                      |                       | 0.11           |
| American Indian/Alaska Native                 | 479      | 0% (1)               | 0% (0)               | 0% (1)                |                |
| Asian                                         | 479      | 0% (0)               | 0% (0)               | 0% (0)                |                |
| Black/African American                        | 479      | 63% (221)            | 63% (81)             | 63% (302)             |                |
| Hawaiian/Pacific Islander                     | 479      | 0% (1)               | 1% (1)               | 0% (2)                |                |
| White non-Hispanic                            | 479      | 34% (118)            | 29% (38)             | 33% (156)             |                |
| White Hispanic                                | 479      | 2% (7)               | 3% (4)               | 2% (11)               |                |
| Multi-racial                                  | 479      | 0% (0)               | 0% (0)               | 0% (0)                |                |
| Other                                         | 479      | 0% (0)               | 0% (0)               | 0% (0)                |                |
| Declined to disclose                          | 479      | 1% (2)               | 4% (5)               | 1% (7)                |                |
| <b>Age at consent</b>                         | 479      | 63.75 (55.11, 70.13) | 62 (53.12, 70.12)    | 62.95 (54.65,70.15)   | 0.325          |
| <b>Baseline literacy score (dichotomized)</b> | 467      |                      |                      |                       | 0.253          |
| Baseline score >= 9                           | 467      | 89% (304)            | 85% (105)            | 88% (409)             |                |
| Baseline score < 9                            | 467      | 11% (39)             | 15% (19)             | 12% (58)              |                |
| <b>KCCQ score (baseline)</b>                  | 469      | 47.4 (33.33, 64.45)  | 46.35 (33.07, 64.58) | 46.88 (33.33, 64.58)  | 0.987          |
| <b>Prior EF</b>                               | 447      |                      |                      |                       | 0.085          |
| Normal                                        | 447      | 42% (140)            | 33% (38)             | 40% (178)             |                |
| Moderate/Severe                               | 447      | 58% (192)            | 67% (77)             | 60% (269)             |                |
| <b>Initial BUN value</b>                      | 472      | 19 (14, 26)          | 18 (13, 27)          | 19 (14, 27)           | 0.203          |
| <b>Initial creatinine value</b>               | 472      | 1.2 (0.95, 1.4)      | 1.15 (0.9, 1.595)    | 1.185 (0.9375, 1.443) | 0.723          |
| <b>Initial Systolic Blood Pressure</b>        | 478      | 143 (126, 164)       | 141 (126, 164)       | 142 (126, 164)        | 0.933          |
| <b>Initial BNP value</b>                      | 208      | 520 (182, 1256)      | 622 (181, 1172)      | 536 (181.2, 1234)     | 0.88           |
| <b>Initial NT-proBNP value</b>                | 242      | 924 (330, 3260)      | 1474 (517.8, 3414)   | 1085 (340, 3270)      | 0.186          |
| <b>Initial troponin I</b>                     | 398      | 0.024 (0.012, 0.04)  | 0.029 (0.0155, 0.04) | 0.025 (0.012, 0.04)   | 0.793          |
| <b>Initial troponin T</b>                     | 24       | 0.03 (0.01, 0.12)    | 0.01 (0.01, 0.0475)  | 0.03 (0.01, 0.08)     | 0.466          |

**Supplemental Table II.** Covariates and their associated odds ratios and p-values from the logistic regression model investigating the KCCQ-12 summary score and association of the intervention at five thresholds of clinically important differences: Deterioration (**A**); Small Improvement (**B**); Moderate Improvement (**C**); Large Improvement (**D**); and Very Large Improvement (**E**).

**A** Deterioration ( $\leq -5$  point loss)

| Covariate                                         | Odds Ratio | 95% CI       | P      |
|---------------------------------------------------|------------|--------------|--------|
| Age (per 5 years)                                 | 1.04       | (0.92, 1.16) | 0.55   |
| Female (ref=Male)                                 | 1.22       | (0.70, 2.11) | 0.49   |
| African American/White Hispanic (ref=White/Other) | 1.03       | (0.56, 1.89) | 0.92   |
| Moderate/Severe prior EF (ref=Normal)             | 0.78       | (0.45, 1.36) | 0.38   |
| ED Systolic BP (per 5 units)                      | 0.97       | (0.92, 1.03) | 0.32   |
| eGFR (per 1 unit)                                 | 1.00       | (0.99, 1.01) | 0.69   |
| Baseline KCCQ summary score (per 5 units)         | 1.16       | (1.08, 1.23) | <0.001 |
| Intervention (ref=Standard of Care)               | 0.56       | (0.34, 0.95) | 0.03   |

**B** Small Improvement ( $>5$  points)

| Covariate                                         | Odds Ratio | 95% CI       | P      |
|---------------------------------------------------|------------|--------------|--------|
| Age (per 5 years)                                 | 0.95       | (0.86, 1.06) | 0.38   |
| Female (ref=Male)                                 | 0.81       | (0.50, 1.32) | 0.40   |
| African American/White Hispanic (ref=White/Other) | 1.01       | (0.60, 1.72) | 0.96   |
| Moderate/Severe prior EF (ref=Normal)             | 1.35       | (0.82, 2.25) | 0.24   |
| ED Systolic BP (per 5 units)                      | 1.04       | (0.99, 1.09) | 0.08   |
| eGFR (per 1 unit)                                 | 1.00       | (0.99, 1.01) | 0.67   |
| Baseline KCCQ summary score (per 5 units)         | 0.88       | (0.83, 0.93) | <0.001 |
| Intervention (ref=Standard of Care)               | 1.48       | (0.95, 2.33) | 0.09   |

**C** Moderate Improvement ( $>10$  points)

| Covariate                                         | Odds Ratio | 95% CI       | P      |
|---------------------------------------------------|------------|--------------|--------|
| Age (per 5 years)                                 | 0.98       | (0.88, 1.09) | 0.69   |
| Female (ref=Male)                                 | 0.86       | (0.53, 1.40) | 0.54   |
| African American/White Hispanic (ref=White/Other) | 1.27       | (0.74, 2.17) | 0.38   |
| Moderate/Severe prior EF (ref=Normal)             | 1.35       | (0.83, 2.19) | 0.23   |
| ED Systolic BP (per 5 units)                      | 1.04       | (1.00, 1.09) | 0.08   |
| eGFR (per 1 unit)                                 | 1.00       | (0.99, 1.01) | 0.63   |
| Baseline KCCQ summary score (per 5 units)         | 0.86       | (0.81, 0.91) | <0.001 |
| Intervention (ref=Standard of Care)               | 1.66       | (1.05, 2.62) | 0.03   |

**D** Large Improvement ( $>15$  points)

| Covariate                                         | Odds Ratio | 95% CI       | P      |
|---------------------------------------------------|------------|--------------|--------|
| Age (per 5 years)                                 | 1.00       | (0.90, 1.12) | 0.97   |
| Female (ref=Male)                                 | 1.06       | (0.64, 1.75) | 0.83   |
| African American/White Hispanic (ref=White/Other) | 1.33       | (0.76, 2.36) | 0.32   |
| Moderate/Severe prior EF (ref=Normal)             | 1.69       | (1.01, 2.85) | 0.05   |
| ED Systolic BP (per 5 units)                      | 1.06       | (1.01, 1.11) | 0.02   |
| eGFR (per 1 unit)                                 | 1.00       | (0.99, 1.01) | 0.92   |
| Baseline KCCQ summary score (per 5 units)         | 0.86       | (0.80, 0.91) | <0.001 |
| Intervention (ref=Standard of Care)               | 1.70       | (1.05, 2.75) | 0.03   |

**E** Very Large Improvement ( $>20$  points)

| Covariate                                         | Odds Ratio | 95% CI       | P      |
|---------------------------------------------------|------------|--------------|--------|
| Age (per 5 years)                                 | 0.98       | (0.87, 1.10) | 0.76   |
| Female (ref=Male)                                 | 1.34       | (0.79, 2.29) | 0.28   |
| African American/White Hispanic (ref=White/Other) | 1.24       | (0.68, 2.29) | 0.48   |
| Moderate/Severe prior EF (ref=Normal)             | 1.46       | (0.83, 2.57) | 0.18   |
| ED Systolic BP (per 5 units)                      | 1.05       | (1.00, 1.11) | 0.04   |
| eGFR (per 1 unit)                                 | 1.00       | (0.99, 1.01) | 0.99   |
| Baseline KCCQ summary score (per 5 units)         | 0.85       | (0.79, 0.91) | <0.001 |
| Intervention (ref=Standard of Care)               | 1.64       | (0.98, 2.74) | 0.06   |
